# Supplementary material for: Rational construction of hierarchical SAPO-34 with enhanced MTO performance without an additional meso/macropore template
Source: Royal Society of Chemistry journal article supplement (doi:10.1039/d0ta08437a), 2020-12-08
Supplement: d0ta08437a1.pdf [file d0ta08437a1.pdf]

## Electronic Supplementary Information (ESI)

### Rational construction of hierarchical SAPO-34 with enhanced MTO performance without additional meso/macropore template

Yafei Liang,<sup>a</sup> Beibei Gao,<sup>\*a</sup> Lipeng Zhou,<sup>a</sup> Xiaomei Yang,<sup>a</sup> Tianliang Lu,<sup>b</sup> Yao hongchang<sup>a</sup> and Yunlai Su<sup>\*a</sup>

<sup>a</sup> Green Catalysis Center, College of Chemistry, Zhengzhou University, Zhengzhou 450001, China. E-mail: gaobeibei@zzu.edu.cn; yunlaisu@zzu.edu.cn.

<sup>b</sup> School of Chemical Engineering, Zhengzhou University, Zhengzhou 450001, China

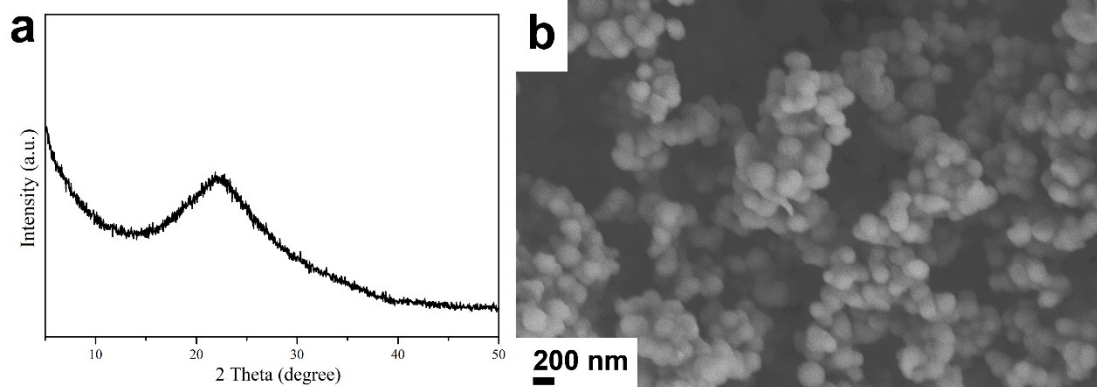

Fig. S1 XRD pattern and SEM image of the APSs precursor.

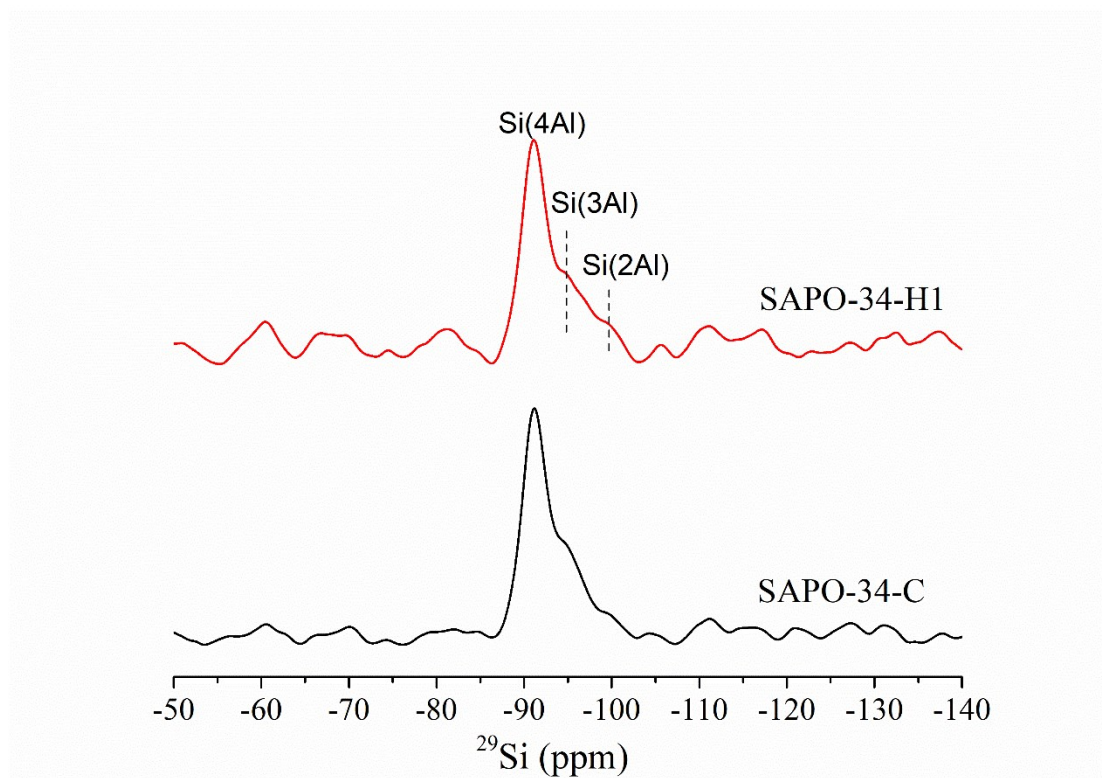

Fig. S2  $^{29}\text{Si}$  MAS NMR spectra of as-synthesized hierarchical SAPO-34-H1 and conventional microporous SAPO-34-C.

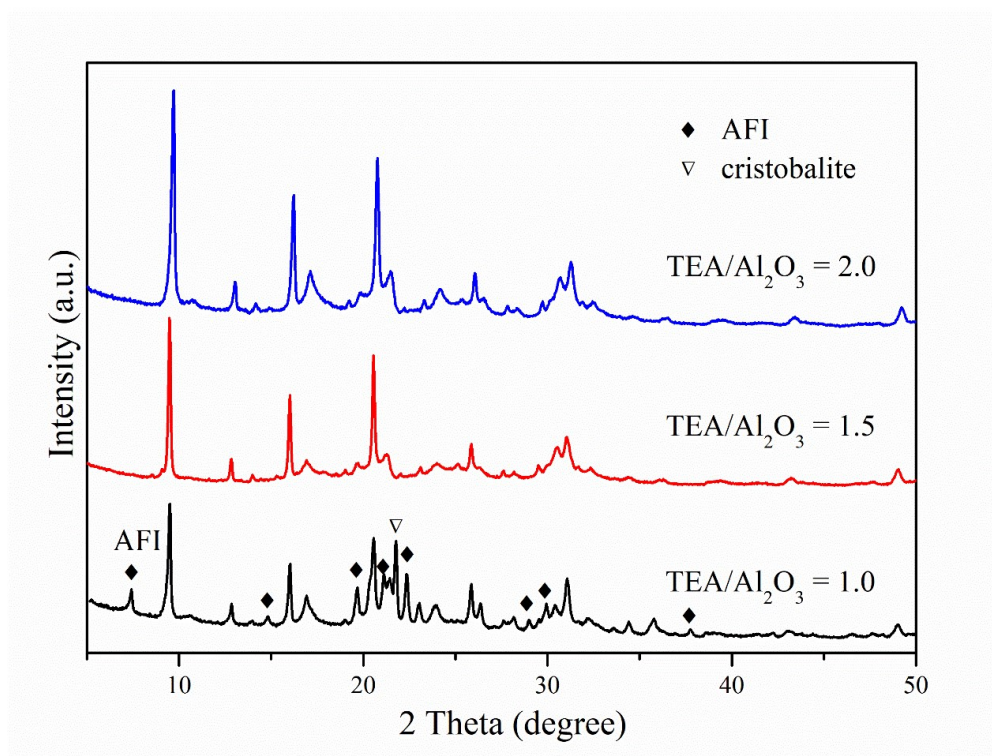

Fig. S3 XRD patterns of the samples synthesized with different TEA/ $\text{Al}_2\text{O}_3$  molar ratios.

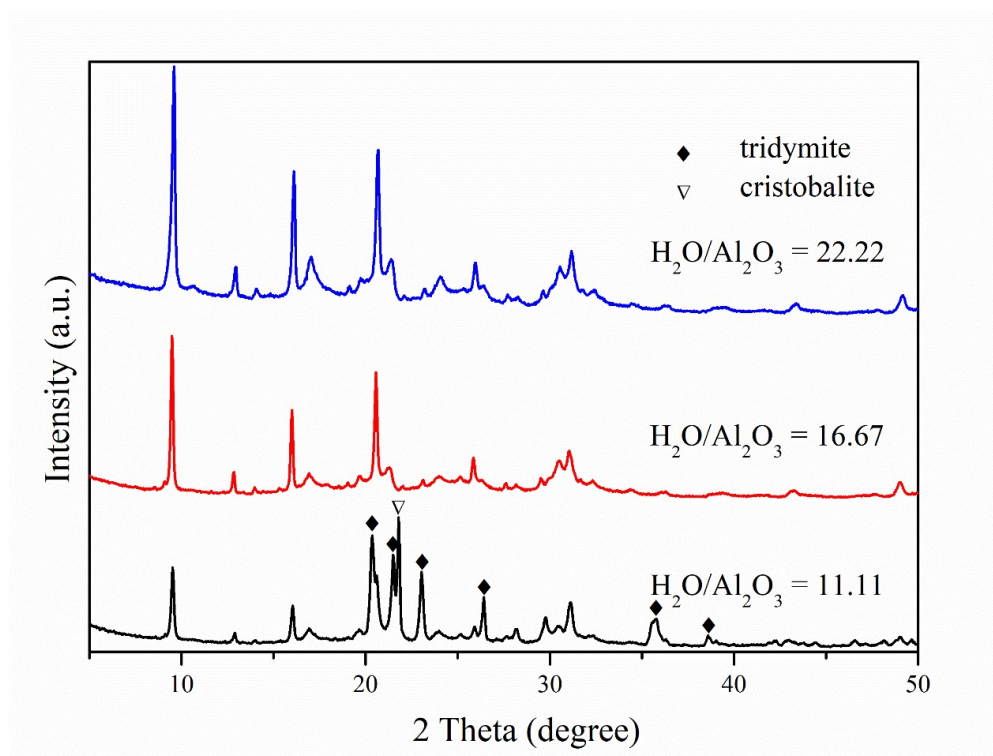

Fig. S4 XRD patterns of the samples synthesized with different  $\text{H}_2\text{O}/\text{Al}_2\text{O}_3$  molar ratios.

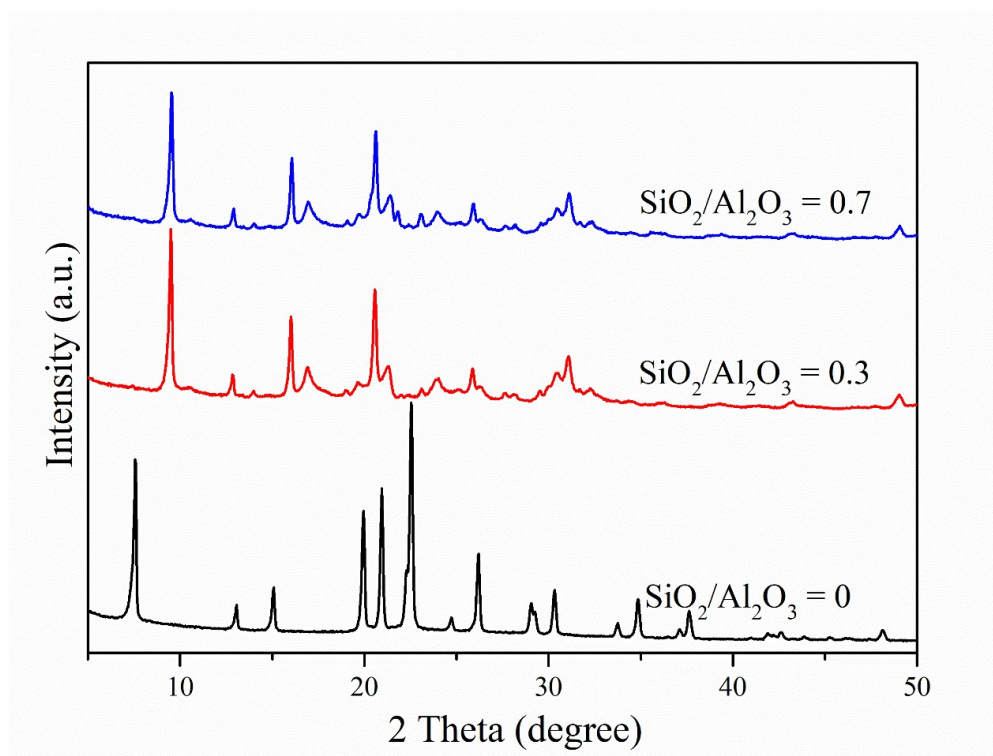

Fig. S5 XRD patterns of the samples synthesized with different  $\text{SiO}_2/\text{Al}_2\text{O}_3$  molar ratios.

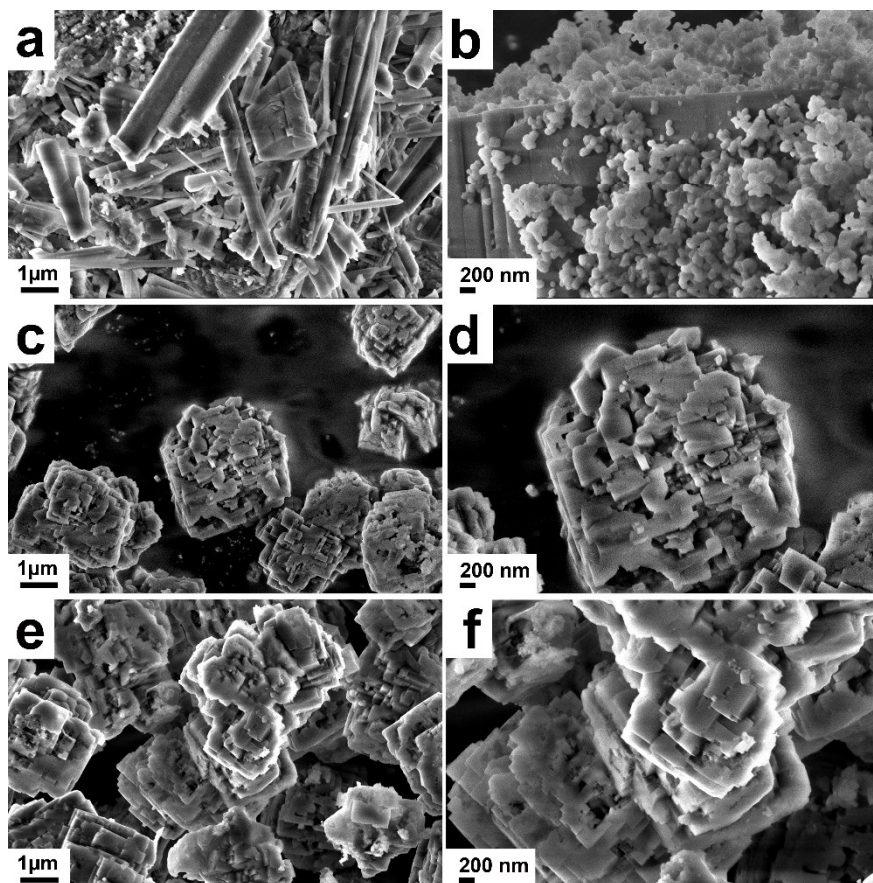

Fig. S6 SEM images of the samples synthesized with  $\text{SiO}_2/\text{Al}_2\text{O}_3$  molar ratio of 0 (a, 1.5TEA), 0 (b, 1.0TEA), 0.3 (c, d) and 0.7 (e, f).

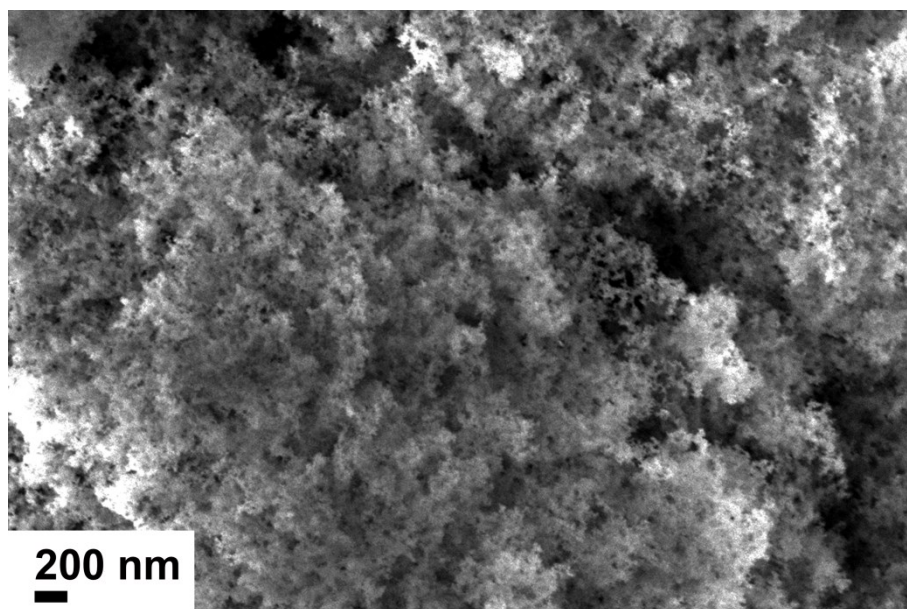

Fig. S7 SEM image of the fumed silica.

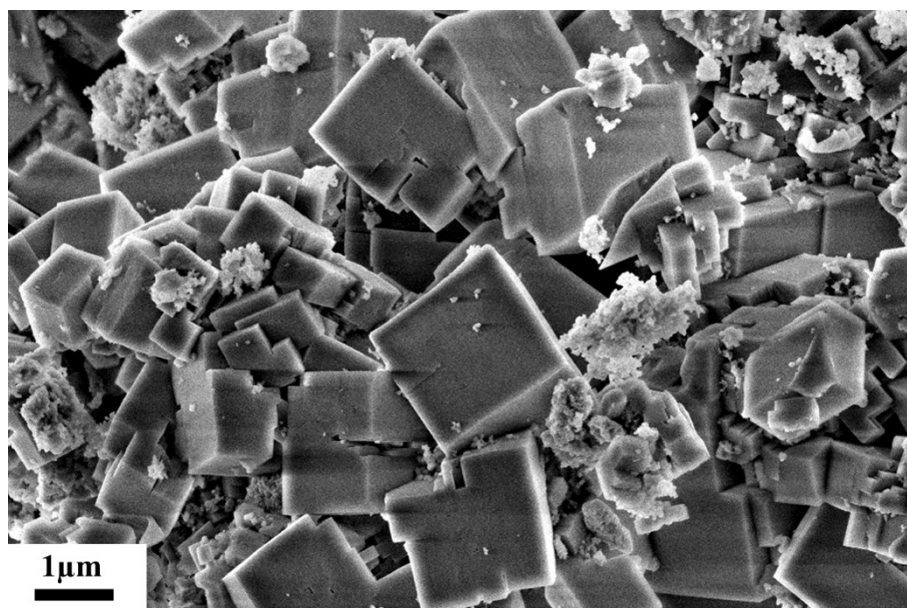

Fig.S8 SEM image of SAPO-34 sample synthesized with aluminium phosphate powder without specific morphology.
